# Supplementary material
Source: PubMed Central journal article supplement (PMC2807365)
Supplement: ddp521_1.pdf [file ddp521_1.pdf]

### Supplementary Table 3 - Sources for HLA Protein Sequence and Functional Domain Determinants

| HLA locus             | PDB ID/ allele for structure information | UniProt ID/ allele for domain information | IMGT/HLA Acc. #/ allele for sequence coordinates | Reference allele for Variant Type 1 definition |
|-----------------------|------------------------------------------|-------------------------------------------|--------------------------------------------------|------------------------------------------------|
| HLA-A <sup>a</sup>    | 1w72 / A*0101                            | P30443 / A*0101                           | HLA00001 / A*01010101                            | A*0101                                         |
| HLA-B <sup>b</sup>    | 3bp4 / B*2705                            | P01889 / B*0702 <sup>f</sup>              | HLA00132 / B*070201                              | B*0702                                         |
| HLA-C <sup>c</sup>    | 1im9 / Cw*0401                           | P30504 / Cw*0401                          | HLA00401 / Cw*010201                             | Cw*0102                                        |
| HLA-DRA               | 1fyt / DRA*0101                          | P01903 / DRA*0101                         | HLA00662 / DRA*0101                              | DRA*0101                                       |
| HLA-DRB1 <sup>d</sup> | 1fyt / DRB1*0101                         | P04229 / DRB1*0101                        | HLA00664 / DRB1*010101                           | DRB1*0101                                      |
| HLA-DRB3 <sup>e</sup> | 2q6w / DRB3*0101                         | P79483 / DRB3*0101                        | HLA00664 / DRB1*010101                           | DRB3*0101                                      |
| HLA-DRB4 <sup>e</sup> | Structure not available <sup>g</sup>     | Information not available                 | HLA00664 / DRB1*010101                           | DRB4*0101                                      |
| HLA-DRB5 <sup>e</sup> | 1h15 / DRB5*0101                         | Q30154 / DRB5*0101                        | HLA00664 / DRB1*010101                           | DRB5*0101                                      |
| HLA-DPA1              | Structure not available <sup>g</sup>     | P20036 / DPA1*0103                        | HLA00499 / DPA1*010301                           | DPA1*0103                                      |
| HLA-DPB1              | Structure not available <sup>g</sup>     | P04440 / DPB1*0401                        | HLA00514 / DPB1*010101                           | DPB1*0101                                      |
| HLA-DQA1              | 1jk8 / DQA1*0302                         | P04225 / DQA1*0302                        | HLA00601/ DQA1*010101                            | DQA1*0101                                      |
| HLA-DQB1              | 1jk8/DQB1*0302                           | P01920 / DQB1*0302                        | HLA00638/ DQB1*050101                            | DQB1*0501                                      |

<sup>a</sup> Dohring, C., Scheidegger, D., Samaridis, J., Cella, M. & Colonna, M. A human killer inhibitory receptor specific for HLA-A1,2. *J Immunol* 156, 3098-3101 (1996), Gao, G.F. et al. Crystal structure of the complex between human CD8alpha(alpha) and HLA-A2. *Nature* 387, 630-634 (1997), Marsh, S.G.E., Parham, P., Barber, L.D. *The HLA Facts Book*. (Academic Press, San Diego, CA; 2000), Pende, D. et al. The natural killer cell receptor specific for HLA-A allotypes: a novel member of the p58/p70 family of inhibitory receptors that is characterized by three immunoglobulin-like domains and is expressed as a 140-kD disulphide-linked dimer. *J Exp Med* 184, 505-518 (1996), Saper, M.A., Bjorkman, P.J. & Wiley, D.C. Refined structure of the human histocompatibility antigen HLA-A2 at 2.6 Å resolution. *J Mol Biol* 219, 277-319 (1991), Thananchai, H. et al. Cutting Edge: Allele-specific and peptide-dependent interactions between KIR3DL1 and HLA-A and HLA-B. *J Immunol* 178, 33-37 (2007).

<sup>b</sup> Barber, L.D. et al. Polymorphism in the alpha 1 helix of the HLA-B heavy chain can have an overriding influence on peptide-binding specificity. *J Immunol* 158, 1660-1669 (1997), Madden, D.R., Gorga, J.C., Strominger, J.L. & Wiley, D.C. The three-dimensional structure of HLA-B27 at 2.1 Å resolution suggests a general mechanism for tight peptide binding to MHC. *Cell* 70, 1035-1048 (1992), Roder, G. et al. Crystal structures of two peptide-HLA-B\*1501 complexes; structural characterization of the HLA-B62 supertype. *Acta Crystallogr D Biol Crystallogr* 62, 1300-1310 (2006), Tynan, F.E. et al. T cell receptor recognition of a 'super-bulged' major histocompatibility complex class I-bound peptide. *Nat Immunol* 6, 1114-1122 (2005).

<sup>c</sup> Boyington, J.C., Motyka, S.A., Schuck, P., Brooks, A.G. & Sun, P.D. Crystal structure of an NK cell immunoglobulin-like receptor in complex with its class I MHC ligand. *Nature* 405, 537-543 (2000), Fan, Q.R., Long, E.O. & Wiley, D.C. Crystal structure of the human natural killer cell inhibitory receptor KIR2DL1-HLA-Cw4 complex. *Nat Immunol* 2, 452-460 (2001), Fan, Q.R. & Wiley, D.C. Structure of human histocompatibility leukocyte antigen (HLA)-Cw4, a ligand for the KIR2D natural killer cell inhibitory receptor. *J Exp Med* 190, 113-123 (1999).

<sup>d</sup> Brogdon, J., Eckels, D.D., Davies, C., White, S. & Doyle, C. A site for CD4 binding in the beta 1 domain of the MHC class II protein HLA-DR1. *J Immunol* 161, 5472-5480 (1998), Fleury, S. et al. HLA-DR polymorphism affects the interaction with CD4. *J Exp Med* 182, 733-741 (1995).

<sup>e</sup> Fleury, S. et al. HLA-DR polymorphism affects the interaction with CD4. *J Exp Med* 182, 733-741 (1995).

<sup>f</sup> Domain information is not available for B\*2705 thus the domain information of the reference allele B\*0702 was obtained

<sup>g</sup>No structures were available for these proteins in the PDB.

**Supplementary Table 4 - Characteristics of the Study Cohort**

| <b>Affection</b>          | <b>Ethnicity</b> |                              |                 | <b>Total</b> |
|---------------------------|------------------|------------------------------|-----------------|--------------|
|                           | <b>Caucasian</b> | <b>African-<br/>American</b> | <b>Hispanic</b> |              |
| <b>Systemic Sclerosis</b> | 961              | 178                          | 161             | 1,300        |
| <b>Control</b>            | 579              | 263                          | 198             | 1,000        |
